# Supplementary material for: Age-related comparisons by sex in the domains of aerobic physical activity for adults in Scotland
Source: PubMed Central journal article supplement (PMC4733093; doi:10.1016/j.pmedr.2015.12.013), 2015-12-30
Supplement: mmc1.pdf [file mmc1.pdf]

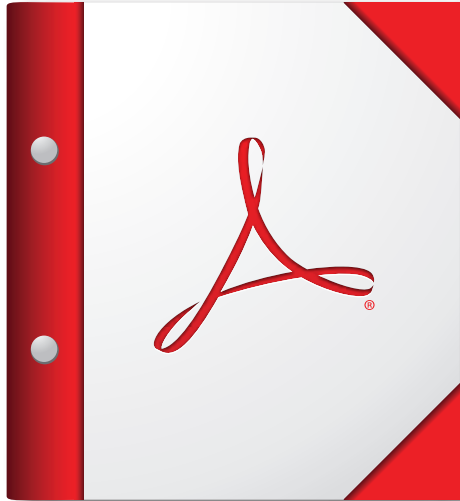

**For the best experience, open this PDF portfolio in  
Acrobat 9 or Adobe Reader 9, or later.**

[Get Adobe Reader Now!](#)
